# Supplementary material
Source: PubMed Central journal article supplement (PMC2660613)
Supplement: tpc.108.060145_1.pdf [file tpc.108.060145_1.pdf]

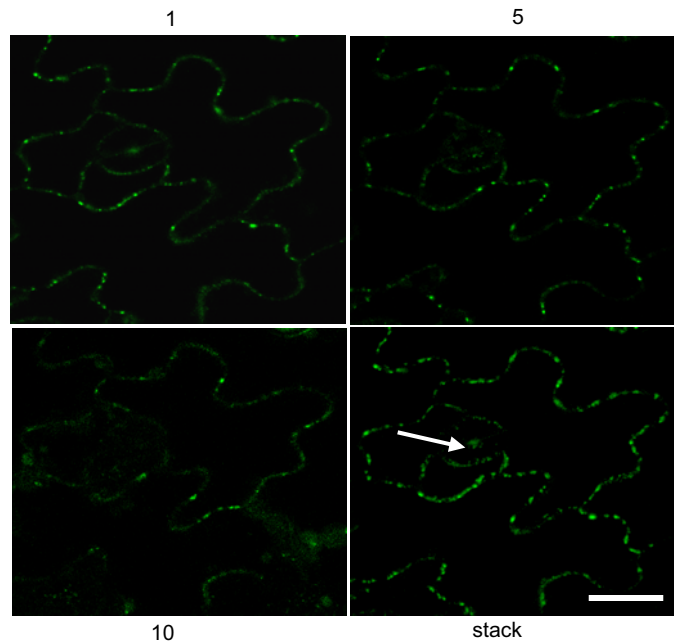

**Supp- Figure 1** Confocal series through *Arabidopsis* leaf epidermal pavement cells expressing *35S:YFP-PDCB1*.

The series is illustrated as individual confocal sections at positions 1, 5 and 10 through a depth of the cell comprising 6  $\mu\text{m}$ . The remaining panel (stack) shows all 10 optical sections combined. The predominant labelling is as a punctate pattern on the wall with little evidence of cytoplasmic labelling. The exception is the single stoma (arrow) present in the centre of the image where the punctate patterning is less evident. Bar = 10  $\mu\text{m}$ .

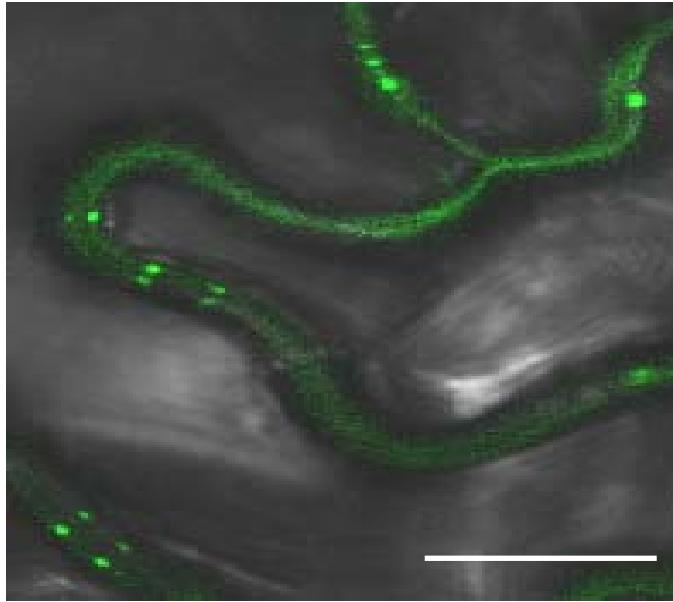

**Supp- Figure 2** Confocal micrograph of *N. benthamiana* tissues transiently expressing *35S:YFP-PDCB1*. PDCB1 was targeted to plasmodesmata (twin punctate spots on the cell wall) but with the high levels of transient expression in *N. benthamiana*, the protein also appeared to accumulate elsewhere on the plasma membrane. Bar = 10  $\mu\text{m}$ .

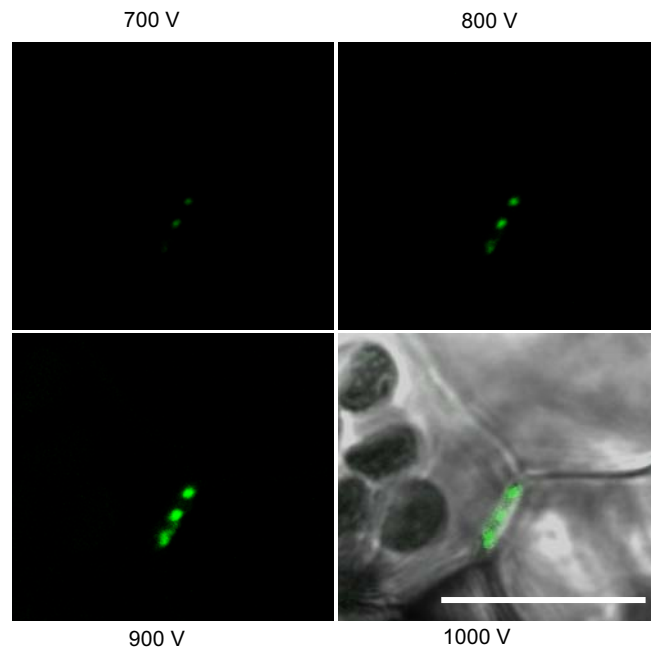

**Supp- Figure 3** Confocal microscopy of unplasmolysed *Arabidopsis* leaf spongy mesophyll cells expressing *35S:YFP-PDCB1* viewed at increasing power settings. Micrographs show the same confocal section viewed with the confocal power settings at 700, 800, 900 and 1000 Volts. The image at 1000 V is combined with the DIC image to show the cell wall boundaries and the restricted points of contact between adjacent cells. Even at the highest power settings the fluorescence is restricted to Pds. Bars= 10  $\mu$ m.

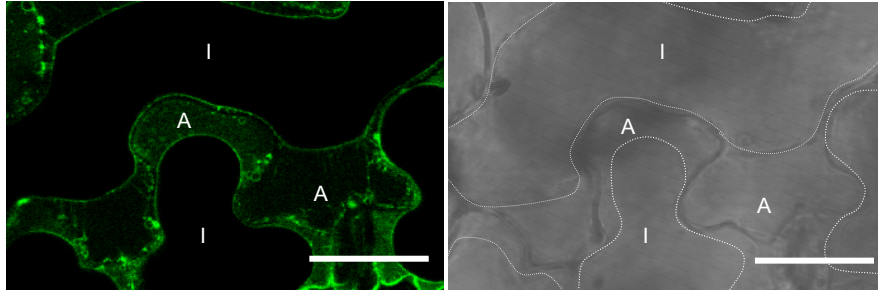

**Supp- Figure 4** *Arabidopsis* leaf epidermal pavement cells expressing *35S:YFP-PDCB1* viewed after plasmolysis without pretreatment with the phospholipase C inhibitor.

In the absence of the inhibitor the apoplastic spaces (A) have become filled with fluorescent protein leached from the wall; intracellular spaces (I) remain devoid of fluorescence. In the DIC image (right) the outline of the retracted plasma membrane is indicated with a dotted line. This leaching contrasts with the situation after pretreatment with the phospholipase C inhibitor (see Figure 2D to F). Bar = 10  $\mu\text{m}$

CLUSTAL W(1.60) multiple sequence alignment of X8 domains

```
at2g43670      WCVAKPSTDNERLQENINFACSIDCQIISEGGACYLPDSIISRASVAMNLYYQAQGRHFW
at1g78520      WCVAKPSSDQVALQDNINFACSVDCRVLLSGCPCYSPSNLINHASIAMNLYYQANGRNYW
at2g43660      WCVAKPGTPIKQLVKNLNNVCSVHCEVVSEGGACYDPINLYNSASVVMNLYYQNGRQYS
at3g28250      WCVAKPGTTLTEQLINNLNYACSVDCQIISTRGACYSPDNIYNMASVVMNLYYQAEGRNFW
at4g16165      WCVANPSAASTQLQANIDWLCS-GCVLIGPGGSCFEPNNVINHASFVMNDYYQLQGSTEE
at1g66870      WCVANVSAASTQLQANIDWACS-DCATINPGGSCFDPDTLVSHASFVMNDFYQNHGSTEE
at1g66855      WCVAAASATDQLQANIDWACN-DCVKINPGGVCEPNTLTSHASFVMNDYYRNHGSIEE
at5g63240      WCIAGDKATDKQLQANIDWVCSRDCGALNSGGPCFEPNTRDHASFAMNLYYQNLGATKE
at5g63250      WCVANKKATDEQLQANIDWCCSRDCTQINPGGVCEPNTLRDHASVVMNLYYQNLGRTKD
at4g09090      WCVAKMNATNAQLQGNINFGCSVDCGPIQPGGSCYIPNSLVNHASFVMNAYYQSHGRTKK
at4g09465      WCIATLIATNAQLQANINFACSVDCRPIRPGGSCFIPNNLANHASFVMNSYYQTHGRTNK
at5g53600      WCTAMPTSTTEQLQSNINFACNVDCAPIQPGGFYYPNTLLDHAAFAMTRYYSQGHNTYA
at5g53610      WCSAMPSSSTEQLQANIQLACSVDCTPIQPGGFYYPNTLLDHASFVMNSYYKSGRRTYA
at5g63230      WCMAMPNATGEQLQANIDYACSVDCPTIIPGGTCEYEPNTLLDHASFAMNAYYQSHGRIED
at2g03505      YCLCRDGVGKEDLQTSIDYACGKDCNPIHEKGPCYQPNITIKSHCDWAVNTYFQRFQGISG
at1g13830      YCLCKDGIQDTELQTSIDYACGADCNPIHDKGTCTYQPDITIKSHCDWAVNSYFQNAAQVPG
at1g69295      YCLCKEKN-EQVLQKAIDYACGADCTQIQPTGACYQPNITVKNHCDWAVNSYYQKASSGA
at1g26450      VCVCKDAN-ELDLQKVIDFACGADCAQIQTTGACYQPNITLKNHCDWAVNSYYQKASTGA
at5g61130      WCVAKMNTGLSDTVLQATLDYACGADCNPTKPKQSCFNPDNVRSHCNVAVNSFFQKKGQSPG
at5g08000      WCVCKTGLSDSVLQKTLTDYACGADCNPTPKGSCFNPDNVRSHCNVAVNSFFQKKGQASE
at1g18650      WCVCKEGLSEAMLQKTLTDYACGADCGPIHQTGPCFNPNVTVKSHCSYAVNSFFQKKGQSLG
at4g13600      WCVARFVDVTSQALQAALDYACAADCAPIQPNGLCFLPNTVQAHASYAFNSYFQRAAMAAPG
at1g29380      WCIAKANASPTSLQVALDYACGADCGQIQQGAACYEPNTRDHASFAFNSSYYQKHPGSD-
Ole-E10       WCVPKAETAQAQLQSNIDYVCSMDCGPIQANGACFNPNTVRAHASYAMNSWYQSKGRNDF
at2g30933      WCVARENVAKMALQAALDYACGADCEIQEGGNLYPNNSLRAHASFAFNSSYYQKNPIPS-
at5g35740      WCIADDEQTPDDELQAALDWACGADCSKMQQNQPCFLPNTIRDHASFAFNSSYYQTYKKNKG
at2g04910      WCVADGQIPDNVIAAAVDWACQADCSTIQPNQPCFLPNTVKDHASVVFNNYYQRYKRNGG
at1g79480      WCVAKPSVDPPIIQEAMNFACGADCHSIQPNGPCFKPNTLWAHASFAFNSSYQRTKSTGG
at1g09460      WCVAKPGASQVSLQALDYACGADCSQLQGGGNCYSPIQLQSHASFAFNSSYYQKN-PSPO
at3g58100     WCVAKNNAEDSSLQTAIEWACGADCGPIQGGPCNDPTDVQKMASVVFNNYYLKNGEDE
at2g42930     WCMENPYAYFRRVIVSSLKWACKADCSPLEKGGRCQDLNRYRSQASYAFNDYYQKN-PIPR

at2g43670      NCNFEGSGLIGITDPSCIIY
at1g78520      NCNFKNSGLITITNPS--F
at2g43660      KCDFEGSGIISVTDPSCIY
at3g28250      NCNFGDSGLVAITDPSLLF
at4g16165      ACNFGSGSRIIDTNPSCVY
at1g66870      ACNFTGTGQVVTADPSCVY
at1g66855      ACEFNHTGQIISGDPSCRY
at5g63240      QCNFHNTGIEVSTDPSCIF
at5g63250      QCTFNGSGSEVTKDPSCIF
at4g09090      ACSFKNTGTFAVTDLS---
at4g09465      ACSFKNTGTFAATDPSCVY
at5g53600      ACSFGNTGYLIISSDPSCIF
at5g53610      ACSFGNTGYLIYSDPSCEF
at5g63230      ACRFRGTGCFVVIDPSCIIY
at2g03505      SCNFGSGTATTSQLNLPSCLY
at1g13830      SCNFGSGTATTNPNPSCIIY
at1g69295      TCDFNAAASPTTTPPSCLT
at1g26450      TCDFNAAAVLSTSPPSCLS
at5g61130      SCNFDGTATPTNSDPSCAF
at5g08000      SCNFTGTATLTTTDPSCAF
at1g18650      TCDFAGTATFSASDPSCPF
at4g13600      SCNFAGTSTIAKTDPSSTWL
at1g29380      SCNFGGAAQLTSTDPSCHF
Ole-E10       DCDFSGTGAITSSDPSCSF
at2g30933      SCNFDGTAITISADPSCHF
at5g35740      SCYFKGAAMI TELDPSCQY
at2g04910      SCNFNSTAFITQTDPSFCY
at1g79480      SCTFGGTGMLVTVDPSCHF
at1g09460      SCDFGGAASLVNTNPSCIIY
at3g58100     ACNFNNAALVSLNPSCKY
at2g42930     NCDFNAAAVLTVQDPSFTF
```

**Supp- Figure 5 Alignment of the X8 domain amino acid sequences for proteins with structural similarity to PDCB1.**

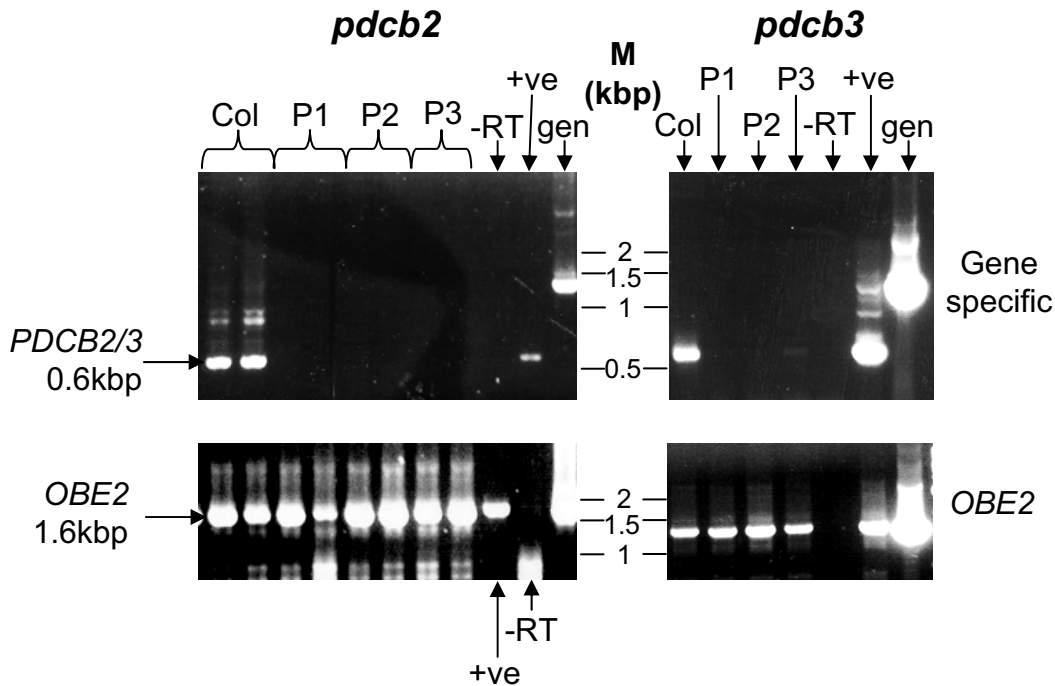

**Supp- Figure 6 RNA analysis for *pdcb2* and *pdcb3* mutant lines.** RNAs from three independent plants (P1-3) each for *pdcb2* and *pdcb3*, and RNA and genomic DNA (gen) from wild type Col-0 (Col) were analysed by RT-PCR using gene specific primers for the accumulation of transcripts from the mutated genes (upper panels). Negative (-RT; reaction lacking RT) and positive (+ve; specific plasmid DNA) control were run in parallel. In addition the samples were analysed for the expression of the OBERON2 gene (Saiga et al., 2008) using specific primers (lower panels). In this qualitative assay, gels were stained with ethidium bromide. The 0.6 kbp diagnostic fragment for *PDCB2* or *PDCB3* RNAs was not detected from any of mutant plants tested (*pdcb2*: three biological and two technical replicates, *pdcb3*: three biological and one technical replicate). M shows the migration of DNA size markers in kbp.

**Reference: Saiga, S., Furumizu, C., Yokoyama, R., Kurata, T., Sato, S., Kato, T., Tabata, S., Suzuki, M. and Komeda, Y. (2008).** The Arabidopsis OBERON1 and OBERON2 genes encode plant homeodomain finger proteins and are required for apical meristem maintenance. *Development* **135**: 1751-1759.

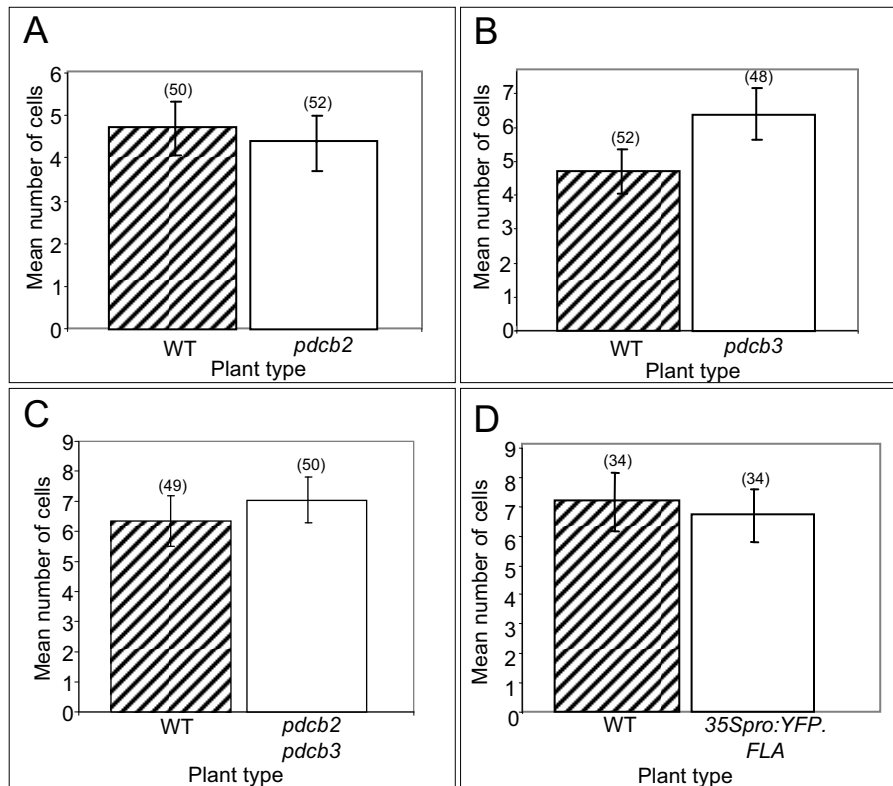

**Supp. Figure 7** GFP trafficking is unchanged in *pdcb2* and -3 knockout lines and in a transgenic line expressing the unrelated GPI-anchor protein FLA13.

**A** GFP diffusion assessed at 48 h post-bombardment in WT and *pdcb2* lines.

**B** GFP diffusion assessed at 48 h postbombardment in WT and *pdcb3* lines.

**C** GFP diffusion assessed at 48 h postbombardment in WT and the *pdcb2 pdcb3* lines.

**D** GFP diffusion assessed in WT and *35Spro:YFP.FLA13* lines.

Numbers in parentheses indicate the numbers of bombardment sites assayed.

Bars = +SE. There was no significant difference in GFP movement in any of the treatments.

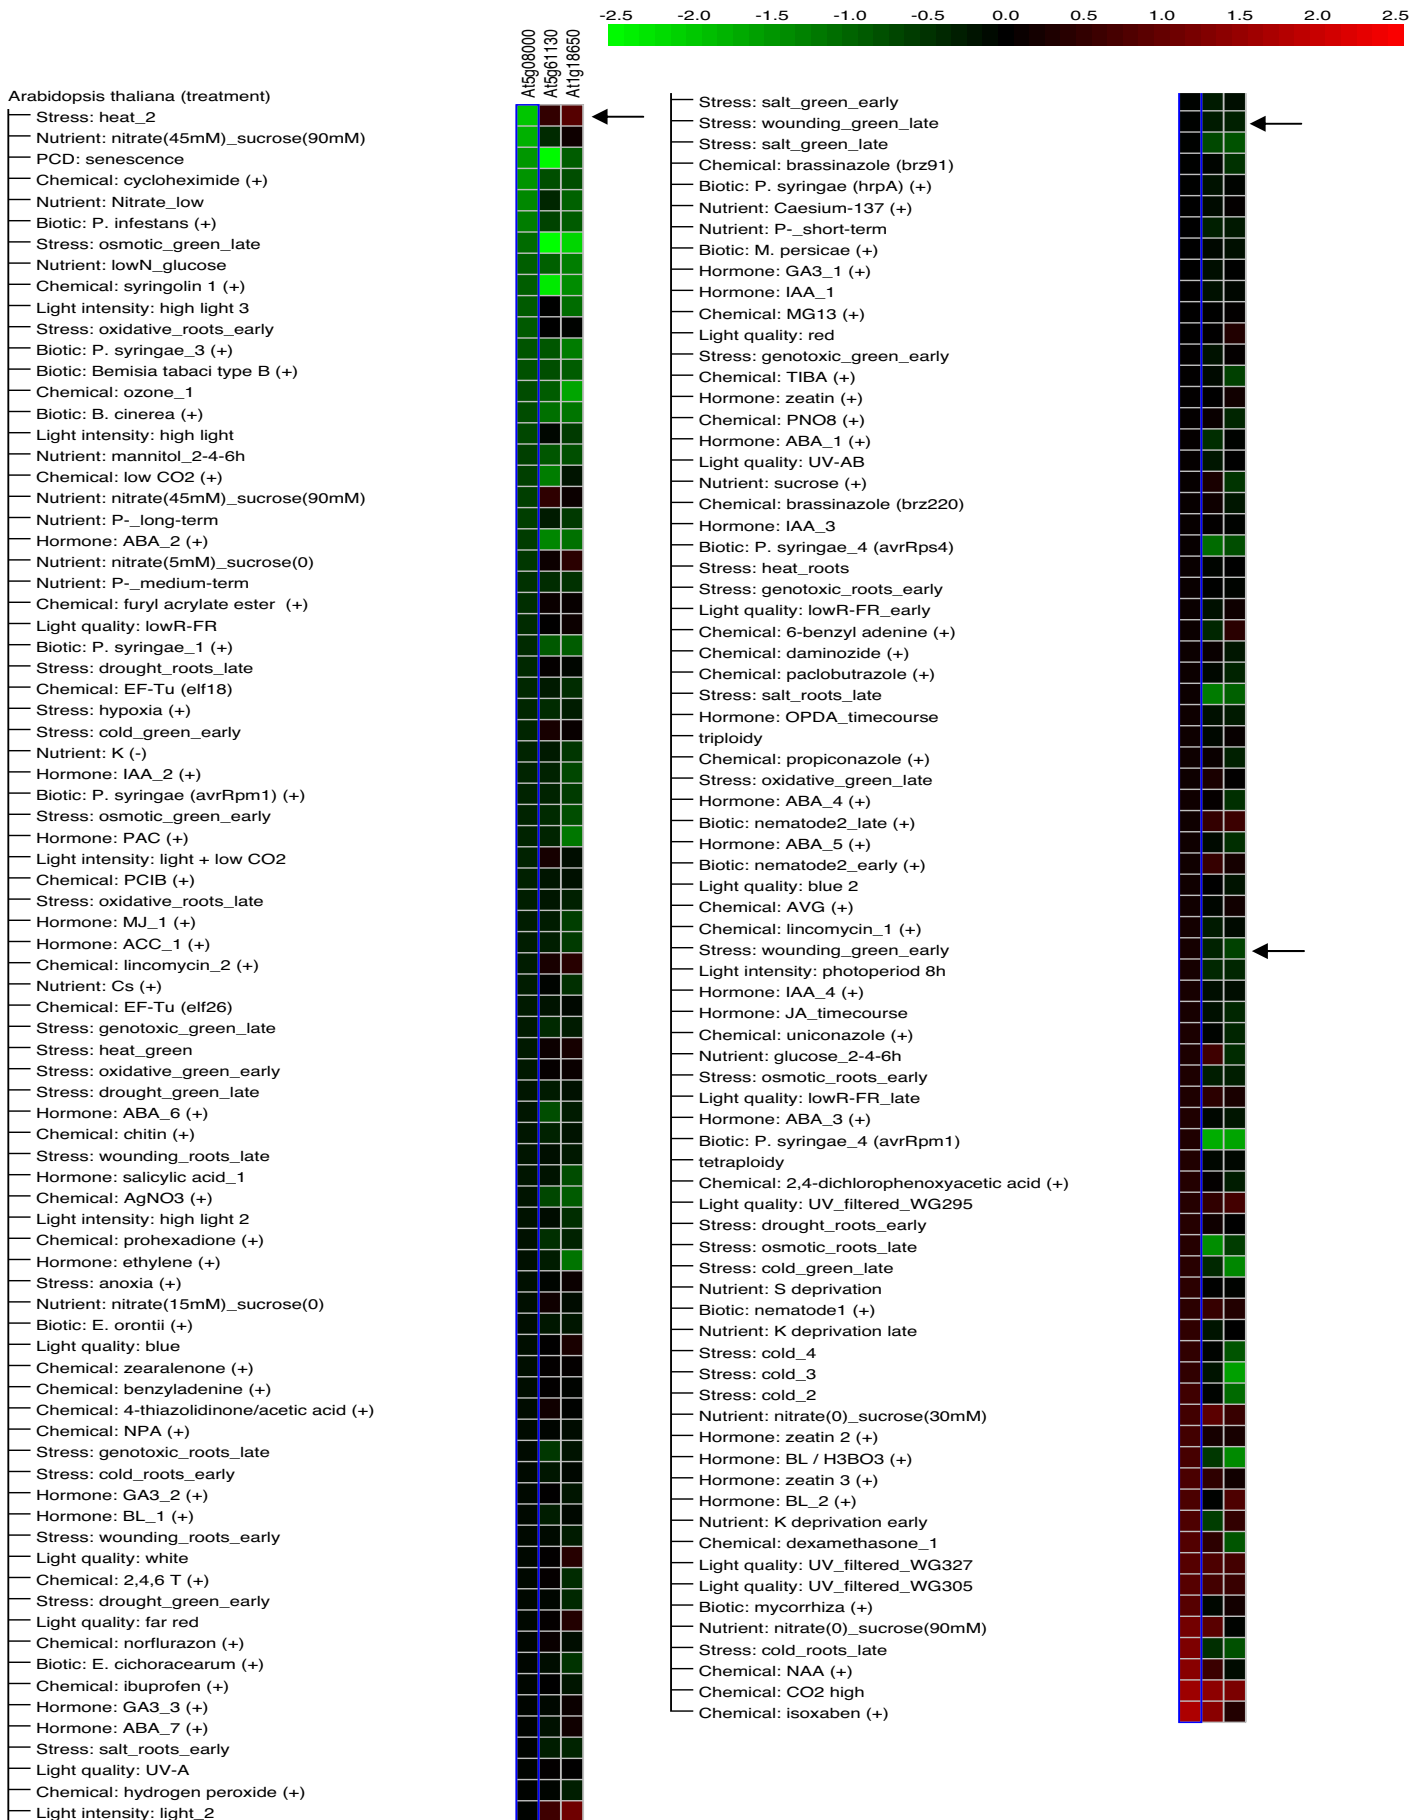

**Supp- Figure 8** Stress-induced changes in the expression of *PDCB* genes (arbitrary units). Public dataset (<https://www.genevestigator.ethz.ch>) for the expression for At5g61130 (*PDCB1*), At5g08000 (*PDCB2*) and At1g18650 (*PDCB3*), displayed as a heat map. Treatments are ranked with respect to the magnitude of the expression changes from down-regulation (green) to up-



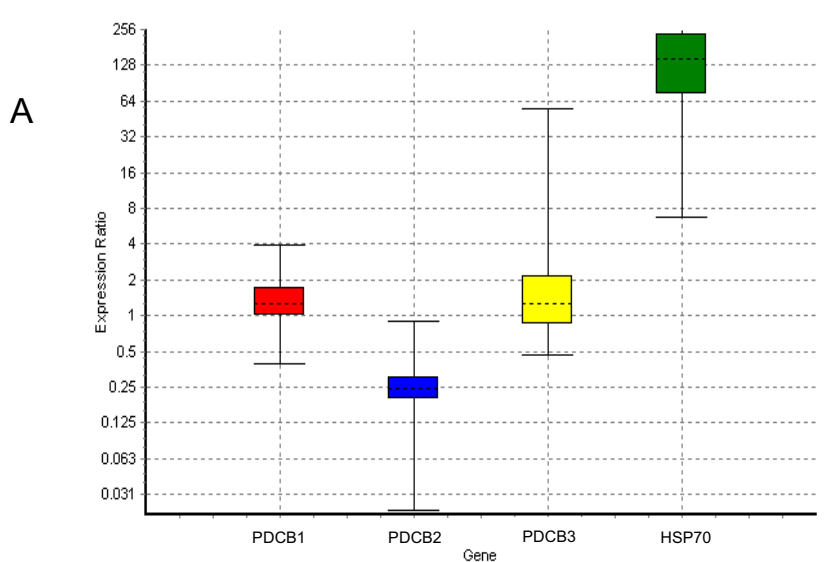

**B**

| Gene          | Type | Expression | Std. Error       | 95% C.I.         | P value | Result |
|---------------|------|------------|------------------|------------------|---------|--------|
| PDCB1         | TRG  | 1.282      | 0.850 - 2.129    | 0.443 - 2.898    | 0.157   |        |
| PDCB2         | TRG  | 0.213      | 0.172 - 0.360    | 0.025 - 0.629    | 0.000   | DOWN   |
| PDCB3         | TRG  | 1.709      | 0.782 - 3.277    | 0.519 - 23.615   | 0.138   |        |
| eIF1 $\alpha$ | REF  | 1.000      |                  |                  |         |        |
| HSP70         | TRG  | 129.310    | 49.262 - 305.593 | 20.573 - 685.441 | 0.000   | UP     |

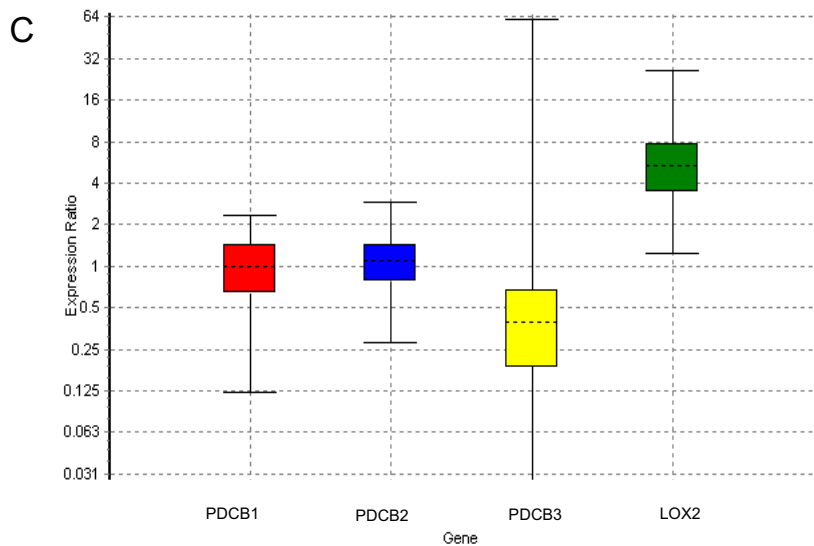

**D**

| Gene          | Type | Expression | Std. Error    | 95% C.I.       | P value | Result |
|---------------|------|------------|---------------|----------------|---------|--------|
| PDCB1         | TRG  | 0.906      | 0.483 - 1.765 | 0.249 - 2.299  | 0.696   |        |
| eIF1 $\alpha$ | REF  | 1.000      |               |                |         |        |
| PDCB2         | TRG  | 1.034      | 0.560 - 1.779 | 0.335 - 2.600  | 0.859   |        |
| PDCB3         | TRG  | 0.512      | 0.140 - 0.858 | 0.056 - 57.004 | 0.304   |        |
| LOX2          | TRG  | 5.391      | 2.954 - 9.416 | 1.759 - 23.641 | 0.000   | UP     |

**Supp- Figure 9** qRT-PCR data for *PDCB* expression following stress treatments

**A** Box plot of qRT-PCR data for heat treated seedlings.

**B** Numerical data as presented in A. TRG=treatment; Ref=Reference

**C** Box plot of qRT-PCR data for wounded seedlings.

**D** Numerical data as presented in C.

Data from three biological and three technical replicates were analysed using REST
